# Supplementary material for: Effectiveness of food quality and safety management systems in Oman’s food supply chain
Source: Research Square preprint supplement (doi:10.21203/rs.3.rs-3867358/v1), 2024-02-14
Supplement: Supplementary file 1 [file 0571743fcbae25c030f5c241.docx]

**Table 3 R-Square**

|  | ***R-Square*** | ***R-Square Adjusted*** |
| --- | --- | --- |
| ***Food supply chain performance*** | 0.795 | 0.790 |
| ***Food traceability*** | 0.022 | 0.018 |
| ***Information technology*** | 0.450 | 0.439 |
| ***Regulatory compliance*** | 0.037 | 0.034 |
