# Supplementary material for: Effectiveness of food quality and safety management systems in Oman’s food supply chain
Source: Research Square preprint supplement (doi:10.21203/rs.3.rs-3867358/v1), 2024-02-14
Supplement: Supplementary file 2 [file 5e84dcb7019944344f8f257a.docx]

**Table 9 Mediation relationships and hypothesis testing**

|  | ***Standard Deviation (STDEV)*** | ***T-Statistics (|O/STDEV|)*** |
| --- | --- | --- |
| ***Food safety requirements-> Information technology -> Food supply chain performance*** | 0.042 | 2.713 |
| ***Performance measures-> Food traceability -> Food supply chain performance*** | 0.007 | 1.025 |
| ***Performance measures-> Regulatory compliance -> Food supply chain performance*** | 0.017 | 2.537 |
| ***Regulatory compliance -> Information technology -> Food supply chain performance*** | 0.050 | 4.732 |
| ***Risks in food supply chain -> Information technology -> Food supply chain performance*** | 0.041 | 2.351 |
| ***Performance measures-> Regulatory compliance -> Information technology -> Food supply chain performance*** | 0.017 | 2.596 |
