# Supplementary material for: Effectiveness of food quality and safety management systems in Oman’s food supply chain
Source: Research Square preprint supplement (doi:10.21203/rs.3.rs-3867358/v1), 2024-02-14
Supplement: Supplementary file 3 [file 79b18d976ce263c52d27078d.docx]

**Table 2 Path analysis**

|  | ***Food supply chain performance*** | ***Food traceability*** | ***Information technology*** | ***Regulatory compliance*** |
| --- | --- | --- | --- | --- |
| ***Food safety requirements*** | 0.366 |  | 0.284 |  |
| ***Food traceability*** | 0.046 |  | 0.131 |  |
| ***Information technology*** | 0.405 |  |  |  |
| ***Performance measures*** | 0.293 | 0.148 | 0.094 | 0.193 |
| ***Regulatory compliance*** | -0.217 |  | 0.580 |  |
| ***Risks in food supply chain*** | 0.243 |  | -0.241 |  |
