# Supplementary material for: Effectiveness of food quality and safety management systems in Oman’s food supply chain
Source: Research Square preprint supplement (doi:10.21203/rs.3.rs-3867358/v1), 2024-02-14
Supplement: Supplementary file 4 [file 8415d15e28da1068290f738f.docx]

**Table 4 Construct reliability and validity**

|  | ***Cronbach’s Alpha*** | ***rho_A*** | ***Composite Reliability*** | ***Average Variance Extracted (AVE)*** |
| --- | --- | --- | --- | --- |
| ***Food safety requirements*** | **0.891** | **0.899** | **0.920** | **0.696** |
| ***Food supply chain performance*** | **0.933** | **0.934** | **0.949** | **0.789** |
| ***Food traceability*** | **0.836** | **0.844** | **0.883** | **0.603** |
| ***Information technology*** | **0.936** | **0.936** | **0.951** | **0.796** |
| ***Performance measures*** | **0.956** | **0.958** | **0.966** | **0.850** |
| ***Regulatory compliance*** | **0.884** | **0.885** | **0.916** | **0.685** |
| ***Risks in food supply chain*** | **0.885** | **0.888** | **0.916** | **0.686** |
