# Supplementary material for: Effectiveness of food quality and safety management systems in Oman’s food supply chain
Source: Research Square preprint supplement (doi:10.21203/rs.3.rs-3867358/v1), 2024-02-14
Supplement: Supplementary file 5 [file 99b6ec1fe22810c88384d780.docx]

**Table 6 Heterotrait-monotrait ratio (HTMT)**

|  | ***Food safety requirements*** | ***Food supply chain performance*** | ***Food traceability*** | ***Information technology*** | ***Performance measures*** | ***Regulatory compliance*** |
| --- | --- | --- | --- | --- | --- | --- |
| ***Food supply chain performance*** | **0.823** |  |  |  |  |  |
| ***Food traceability*** | **0.150** | **0.285** |  |  |  |  |
| ***Information technology*** | **0.431** | **0.639** | **0.374** |  |  |  |
| ***Performance measures*** | **0.547** | **0.696** | **0.162** | **0.276** |  |  |
| ***Regulatory compliance*** | **0.387** | **0.408** | **0.434** | **0.663** | **0.210** |  |
| ***Risks in food supply chain*** | **0.689** | **0.685** | **0.301** | **0.379** | **0.473** | **0.659** |
