# Supplementary material for: Effectiveness of food quality and safety management systems in Oman’s food supply chain
Source: Research Square preprint supplement (doi:10.21203/rs.3.rs-3867358/v1), 2024-02-14
Supplement: Supplementary file 6 [file 9c606a4d948af7a59fa12bfd.docx]

**Table 5: Fornell-Larcker Criterion**

|  | ***Food safety requirements*** | ***Food supply chain perfomance*** | ***Food traceability*** | ***Information technology*** | ***Perfomance measures*** | ***Regulatory compliance*** | ***Risks in food supply chain*** |
| --- | --- | --- | --- | --- | --- | --- | --- |
| ***Food safety requirements*** | 0.834 |  |  |  |  |  |  |
| ***Food supply chain perfomance*** | 0.758 | 0.888 |  |  |  |  |  |
| ***Food traceability*** | 0.129 | 0.254 | 0.777 |  |  |  |  |
| ***Information technology*** | 0.401 | 0.597 | 0.334 | 0.892 |  |  |  |
| ***Perfomance measures*** | 0.507 | 0.656 | 0.148 | 0.264 | 0.922 |  |  |
| ***Regulatory compliance*** | 0.348 | 0.370 | 0.369 | 0.605 | 0.193 | 0.827 |  |
| ***Risks in food supply chain*** | 0.619 | 0.623 | 0.256 | 0.347 | 0.434 | 0.583 | 0.828 |
