# Supplementary material for: Effectiveness of food quality and safety management systems in Oman’s food supply chain
Source: Research Square preprint supplement (doi:10.21203/rs.3.rs-3867358/v1), 2024-02-14
Supplement: Supplementary file 7 [file a0b647f6ce8fa78380c1ee8f.docx]

**Table 7 Factor analysis**

|  | ***Food safety requirements*** | ***Food supply chain performance*** | ***Food traceability*** | ***Information technology*** | ***Performance measures*** | ***Regulatory compliance*** |
| --- | --- | --- | --- | --- | --- | --- |
| ***FR1*** | **0.797** |  |  |  |  |  |
| ***FR2*** | **0.793** |  |  |  |  |  |
| ***FR3*** | **0.884** |  |  |  |  |  |
| ***FR4*** | **0.886** |  |  |  |  |  |
| ***FR5*** | **0.806** |  |  |  |  |  |
| ***FS1*** |  | **0.907** |  |  |  |  |
| ***FS2*** |  | **0.901** |  |  |  |  |
| ***FS3*** |  | **0.817** |  |  |  |  |
| ***FS4*** |  | **0.907** |  |  |  |  |
| ***FS5*** |  | **0.904** |  |  |  |  |
| ***FT1*** |  |  | **0.758** |  |  |  |
| ***FT2*** |  |  | **0.836** |  |  |  |
| ***FT3*** |  |  | **0.819** |  |  |  |
| ***FT4*** |  |  | **0.747** |  |  |  |
| ***FT5*** |  |  | **0.717** |  |  |  |
| ***IT1*** |  |  |  | **0.913** |  |  |
| ***IT2*** |  |  |  | **0.898** |  |  |
| ***IT3*** |  |  |  | **0.828** |  |  |
| ***IT4*** |  |  |  | **0.914** |  |  |
| ***IT5*** |  |  |  | **0.905** |  |  |
| ***PM1*** |  |  |  |  | **0.930** |  |
| ***PM2*** |  |  |  |  | **0.936** |  |
| ***PM3*** |  |  |  |  | **0.872** |  |
| ***PM4*** |  |  |  |  | **0.930** |  |
| ***PM5*** |  |  |  |  | **0.940** |  |
| ***RC1*** |  |  |  |  |  | **0.756** |
| ***RC2*** |  |  |  |  |  | **0.858** |
| ***RC3*** |  |  |  |  |  | **0.858** |
| ***RC4*** |  |  |  |  |  | **0.816** |
| ***RC5*** |  |  |  |  |  | **0.845** |
