# Supplementary material for: Effectiveness of food quality and safety management systems in Oman’s food supply chain
Source: Research Square preprint supplement (doi:10.21203/rs.3.rs-3867358/v1), 2024-02-14
Supplement: Supplementary file 8 [file a6c16c72c659c1ca647a2543.docx]

**Table 1 Measurement scales and their sources**

| ***Item Code*** | ***Description*** | ***Sources of Questions*** |
| --- | --- | --- |
| ***Risk in food supply chains*** | | |
| ***FR1*** | *Natural events like tsunamis* | 23–26,31 |
| ***FR2*** | *Financial crisis such as exchange risks* |
| ***FR3*** | *Labour disputes* |
| ***FR4*** | *Inadequate and improper storage* |
| ***FR5*** | *Wrong temperature levels* |
| ***Food safety requirements*** | | |
| ***FS1*** | *Security of the food source* | 32,37,38,40 |
| ***FS2*** | *Independent and public health judgement* |
| ***FS3*** | *Concrete action in the enforcement regulations* |
| ***FS4*** | *Process control* |
| ***FS5*** | *Training and education* |
| ***Food traceability*** | | |
| ***FT1*** | *Traceability technology adoption* | 68–73,79 |
| ***FT2*** | *Traceability accuracy systems* |
| ***FT3*** | *Recall management efficiency* |
| ***FT4*** | *Quality control* |
| ***FT5*** | *Block chain* |
| ***Information technology*** | | |
| ***IT1*** | *Inventory management systems* | 11,45,47,50,52,59–62 |
| ***IT2*** | *Supply chain visibility* |
| ***IT3*** | *Demand forecasting and planning tools* |
| ***IT4*** | *Transportation technology* |
| ***IT5*** | *Logistics technology* |
| ***Performance measures*** | | |
| ***PM1*** | *Risk analysis and risk investment* | 45,48,50–53,55 |
| ***PM2*** | *Risk investment* |
| ***PM3*** | *Flow of information between supply chain partners* |
| ***PM4*** | *Customer satisfaction* |
| ***PM5*** | *Revenue indicators* |
| ***Regulatory compliance*** | | |
| ***RC1*** | *Audit findings* | 80,83,84,86 |
| ***RC2*** | *Regulatory compliance score* |
| ***RC3*** | *Adherence to Food Safety Standards* |
| ***RC4*** | *Legal compliance costs* |
| ***RC5*** | *Compliance measures* |
