# Supplementary material for: Effectiveness of food quality and safety management systems in Oman’s food supply chain
Source: Research Square preprint supplement (doi:10.21203/rs.3.rs-3867358/v1), 2024-02-14
Supplement: Supplementary file 9 [file fa5946195ede019f8668bc1d.docx]

**Table 8 Direct relationships and hypothesis testing**

|  | ***Standard Deviation (STDEV)*** | ***T-Statistics (|O/STDEV|)*** |
| --- | --- | --- |
| ***Food safety requirements-> Food supply chain performance*** | 0.046 | 7.978 |
| ***Food safety requirements-> Information technology*** | 0.080 | 3.568 |
| ***Food traceability -> Food supply chain performance*** | 0.032 | 1.434 |
| ***Food traceability -> Information technology*** | 0.051 | 2.561 |
| ***Information technology -> Food supply chain performance*** | 0.065 | 6.193 |
| ***Performance measures-> Food supply chain performance*** | 0.053 | 5.544 |
| ***Performance measures-> Food traceability*** | 0.064 | 2.291 |
| ***Performance measures-> Information technology*** | 0.061 | 1.527 |
| ***Performance measures -> Regulatory compliance*** | 0.068 | 2.816 |
| ***Regulatory compliance -> Food supply chain performance*** | 0.064 | 3.370 |
| ***Regulatory compliance -> Information technology*** | 0.061 | 9.438 |
| ***Risks in food supply chain -> Food supply chain performance*** | 0.055 | 4.417 |
| ***Risks in food supply chain -> Information technology*** | 0.087 | 2.754 |
|  |  |  |
